# Supplementary material for: Inhibitory effects of fenretinide metabolites N-[4-methoxyphenyl]retinamide (MPR) and 4-oxo-N-(4-hydroxyphenyl)retinamide (3-keto-HPR) on fenretinide molecular targets β-carotene oxygenase 1, stearoyl-CoA desaturase 1 and dihydroceramide Δ4-desaturase 1
Source: PLoS One. 2017 Apr 27;12(4):e0176487. doi: 10.1371/journal.pone.0176487 (PMC5407626; doi:10.1371/journal.pone.0176487)
Supplement: S2 Table — AUC values for C18 ceramide/C18 dihydroceramide (Sheet 1), C16 ceramide/ C16 dihydroceramide (Sheet 2) and protein concentration (Sheet 3) measured by AB Sciex API2000 triple quadrupole mass spectrometer are presented for five treatment groups (DMSO, 4-HPR, MPR, 3-keto-HPR and A1120). (XLSX) [file pone.0176487.s002.xlsx]

## Sheet: Standards
STOCK SOLUTIONS
Compound	Concentration
	(mg / ml)
C16 Ceramide	2.3
MW = 538	2.3
	2.3
C18 Ceramide	1.5
MW = 566	1.5
	1.5
C16 Dihydroceramide	0.9
MW = 540	0.9
	0.9
C18 Dihydroceramide	0.8
MW = 568	0.8
	0.8

## Sheet: ARPE Protein Conc.
SAMPLE	TUBE #	SAMPLE NAME	PROTEIN CONC.	PROTEIN	ALIQUOT		ARPE 19 Samples processed on 02152017
			µg / µl	µg	µl		Protein Assay - WS
Control	1A	EP_ARPE_CER002	1.23	216	175.61
	1B	EP_ARPE_CER003	0.54	216	400
	1C	EP_ARPE_CER004	0.68	216	317.647
4HPR	2A	EP_ARPE_CER005	1.4	216	154.286
	2B	EP_ARPE_CER006	1.23	216	175.61
	2C	EP_ARPE_CER007	1.32	216	163.636
3-KETO	3A	EP_ARPE_CER008	0.98	216	220.408
	3B	EP_ARPE_CER009	1.06	216	203.774
	3C	EP_ARPE_CER010	0.97	216	222.68
A1120	4A	EP_ARPE_CER011	1.11	216	194.595
	4B	EP_ARPE_CER012	1.04	216	207.692
	4C	EP_ARPE_CER013	0.77	216	280.519
MPR	5A	EP_ARPE_CER014	1.1	216	196.364
	5B	EP_ARPE_CER015	1.25	216	172.8
	5C	EP_ARPE_CER016	1.42	216	152.113

## Sheet: Results C18 Ceramide
SAMPLE NAME	TREATMENT	COMPOUND	Mass Injected	Volume Injected	Total Volume	Ceramide Content			DHCER	CER	RATIO	MEAN	STDEV
			(ng)	(µl)	(µl)	(ng)
EP_ARPE_CER002	CONTROL (DMSO)	C18 CER	2	20	100	10			2.25	10	0.225	0.288692	0.0851634
EP_ARPE_CER003	CONTROL (DMSO)		2.47	20	100	12.35			4.76	12.35	0.385425
EP_ARPE_CER004	CONTROL (DMSO)		2.3	20	100	11.5			2.94	11.5	0.255652
EP_ARPE_CER005	4HPR		2.56	20	100	12.8			9.3	12.8	0.726562	0.656283	0.0625551
EP_ARPE_CER006	4HPR		2.36	20	100	11.8			7.5	11.8	0.635593
EP_ARPE_CER007	4HPR		2.39	20	100	11.95			7.25	11.95	0.606695
EP_ARPE_CER008	MPR		2.93	20	100	14.65			5.3	14.65	0.361775	0.337507	0.0218449
EP_ARPE_CER009	MPR		3	20	100	15			4.97	15	0.331333
EP_ARPE_CER010	MPR		2.73	20	100	13.65			4.36	13.65	0.319414
EP_ARPE_CER011	KETO		2.87	20	100	14.35			9.7	14.35	0.675958	0.706162	0.0605403
EP_ARPE_CER012	KETO		2.9	20	100	14.5			11.25	14.5	0.775862
EP_ARPE_CER013	KETO		2.91	20	100	14.55			9.7	14.55	0.666667
EP_ARPE_CER014	A1120		2.32	20	100	11.6			1.58	11.6	0.136207	0.15279	0.0431783
EP_ARPE_CER015	A1120		3.33	20	100	16.65			3.36	16.65	0.201802
EP_ARPE_CER016	A1120		2.21	20	100	11.05			1.33	11.05	0.120362
EP_ARPE_CER002	CONTROL (DMSO)	C18 DHCER	0.449	20	100	2.245
EP_ARPE_CER003	CONTROL (DMSO)		0.952	20	100	4.76			DMSO	0.288692	0.0851634
EP_ARPE_CER004	CONTROL (DMSO)		0.588	20	100	2.94			4HPR	0.656283	0.0625551
EP_ARPE_CER005	4HPR		1.86	20	100	9.3			MPR	0.337507	0.0218449
EP_ARPE_CER006	4HPR		1.5	20	100	7.5			3-KETO-HPR	0.706162	0.0605403
EP_ARPE_CER007	4HPR		1.45	20	100	7.25			A1120	0.15279	0.0431783
EP_ARPE_CER008	MPR		1.06	20	100	5.3
EP_ARPE_CER009	MPR		0.994	20	100	4.97
EP_ARPE_CER010	MPR		0.871	20	100	4.355
EP_ARPE_CER011	KETO		1.94	20	100	9.7
EP_ARPE_CER012	KETO		2.25	20	100	11.25
EP_ARPE_CER013	KETO		1.94	20	100	9.7
EP_ARPE_CER014	A1120		0.316	20	100	1.58
EP_ARPE_CER015	A1120		0.672	20	100	3.36
EP_ARPE_CER016	A1120		0.265	20	100	1.325

## Sheet: Results C16 Ceramide
SAMPLE NAME	TREATMENT	COMPOUND	Mass Injected	Volume Injected	Total Volume	Ceramide Content			DHCER	CER	RATIO	MEAN	STDEV
			(ng)	(µl)	(µl)	(ng)					(DH / C)
EP_ARPE_CER002	CONTROL (DMSO)	C16 CER	3.67	20	100	18.35			0.2985	18.35	0.016267	0.0775311	0.0820543
EP_ARPE_CER003	CONTROL (DMSO)		4.89	20	100	24.45			4.175	24.45	0.170757
EP_ARPE_CER004	CONTROL (DMSO)		3.95	20	100	19.75			0.9	19.75	0.0455696
EP_ARPE_CER005	4HPR		3.7	20	100	18.5			6.15	18.5	0.332432	0.300315	0.0572559
EP_ARPE_CER006	4HPR		3.42	20	100	17.1			4.005	17.1	0.234211
EP_ARPE_CER007	4HPR		3.44	20	100	17.2			5.75	17.2	0.334302
EP_ARPE_CER008	MPR		4.08	20	100	20.4			2.68	20.4	0.131373	0.0827675	0.0428082
EP_ARPE_CER009	MPR		4.06	20	100	20.3			1.345	20.3	0.0662562
EP_ARPE_CER010	MPR		3.71	20	100	18.55			0.94	18.55	0.0506739
EP_ARPE_CER011	KETO		5.03	20	100	25.15			19.55	25.15	0.777336	0.664601	0.101402
EP_ARPE_CER012	KETO		4.94	20	100	24.7			15.7	24.7	0.635628
EP_ARPE_CER013	KETO		5.01	20	100	25.05			14.55	25.05	0.580838
EP_ARPE_CER014	A1120		3.66	20	100	18.3			1	18.3	0.0546448	0.0715674	0.066331
EP_ARPE_CER015	A1120		4.83	20	100	24.15			3.495	24.15	0.14472
EP_ARPE_CER016	A1120		3.71	20	100	18.55			0.2845	18.55	0.0153369
EP_ARPE_CER002	CONTROL (DMSO)	C16 DHCER	0.0597	20	100	0.2985
EP_ARPE_CER003	CONTROL (DMSO)		0.835	20	100	4.175			DMSO	0.0775311	0.0820543
EP_ARPE_CER004	CONTROL (DMSO)		0.18	20	100	0.9			4HPR	0.300315	0.0572559
EP_ARPE_CER005	4HPR		1.23	20	100	6.15			MPR	0.0827675	0.0428082
EP_ARPE_CER006	4HPR		0.801	20	100	4.005			KETO	0.664601	0.101402
EP_ARPE_CER007	4HPR		1.15	20	100	5.75			A1120	0.0715674	0.066331
EP_ARPE_CER008	MPR		0.536	20	100	2.68
EP_ARPE_CER009	MPR		0.269	20	100	1.345
EP_ARPE_CER010	MPR		0.188	20	100	0.94
EP_ARPE_CER011	KETO		3.91	20	100	19.55
EP_ARPE_CER012	KETO		3.14	20	100	15.7
EP_ARPE_CER013	KETO		2.91	20	100	14.55
EP_ARPE_CER014	A1120		0.2	20	100	1
EP_ARPE_CER015	A1120		0.699	20	100	3.495
EP_ARPE_CER016	A1120		0.0569	20	100	0.2845
